# Supplementary material for: In situ de-agglomeration and surface functionalization of detonation nanodiamond, with the polymer used as an additive in lubricant oil
Source: Royal Society of Chemistry journal article supplement (doi:10.1039/c1jm10903k), 2011-01-01
Supplement: c1jm10903k.pdf [file c1jm10903k.pdf]

Supporting Information

**In-situ deagglomeration and surface functionalization of detonation nanodiamond with polymer was used as lubricant additives in oil.**

*Yu Lin Hsin<sup>\*,a</sup>, Hsiao Yeh Chu<sup>\*,b</sup>, Yean-Ren Jeng<sup>\*,c</sup>, Yao-Huei Huang<sup>a,c</sup>,*

*Mei Hua Wang<sup>a</sup> and Chih Kuang Chang<sup>a</sup>.*

Table S1. Rheological properties of CPC R68 oil.

|                                 |         |
|---------------------------------|---------|
| Grade no.                       | R68     |
| Specific gravity at 15.6 °C     | 0.8838  |
| Viscosity, Kin., cSt (at 40 °C) | 67.83   |
| (at 100 °C)                     | 8.62    |
| Viscosity index                 | 98      |
| Pour point (°C)                 | -12     |
| Flash point, COC (°C)           | 264     |
| Color (ASTM D1500)              | L1.0    |
| Total acid number (mg KOH/g)    | 0.08    |
| Carbon residue, Rams. (%)       | 0.08    |
| Product no.                     | LA60343 |

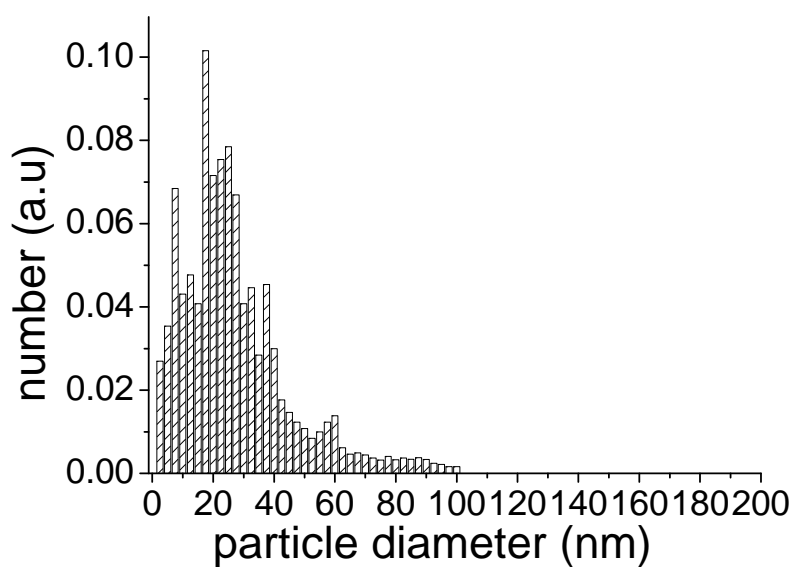

FigS1(a). The particle size distribution of dUDD-PGMA in DMSO.

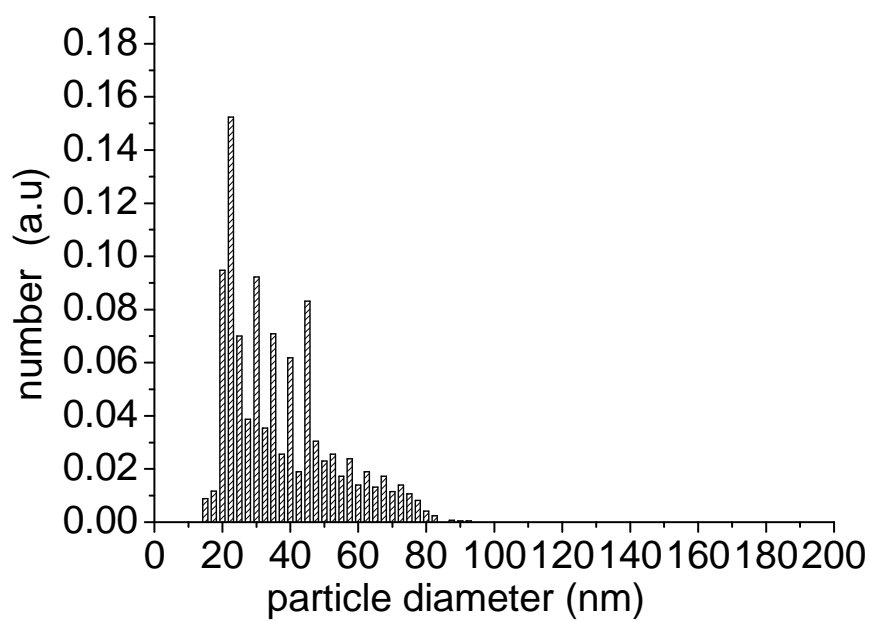

FigS1(b). The particle size distribution of dUDD-PMMA in THF.

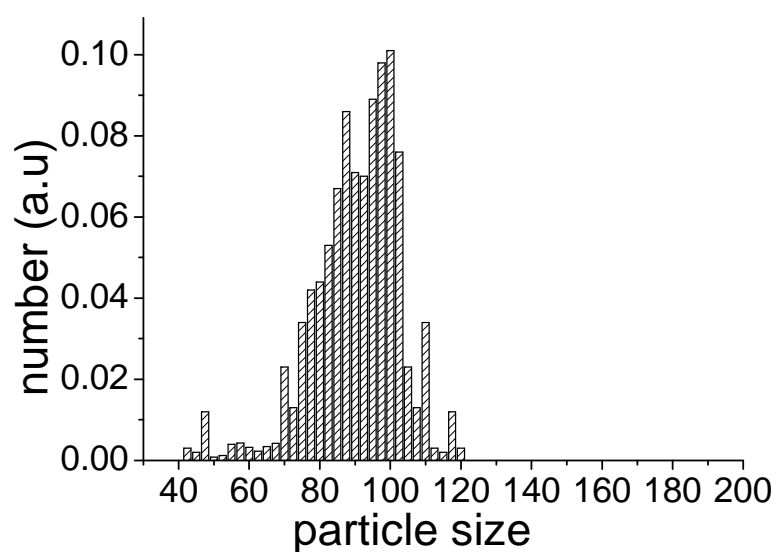

FigS1(c). The particle size distribution of dUDD-PS in toluene.

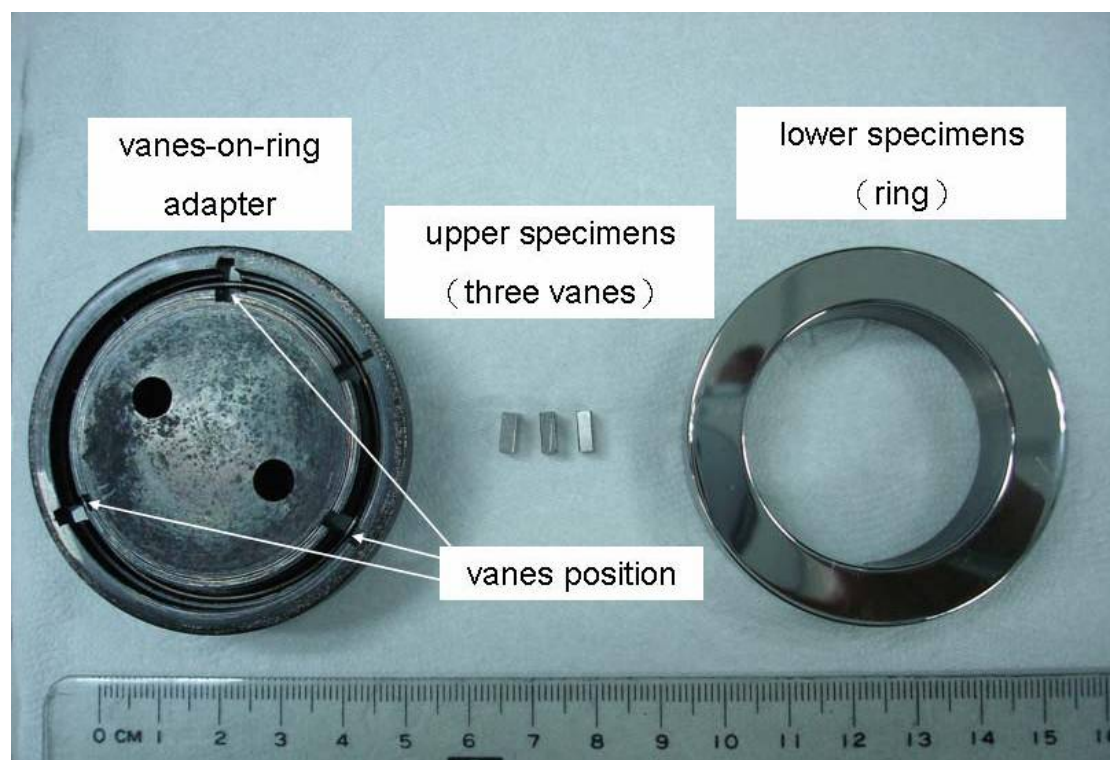

FigS2. Photograph of Vanes-on-ring adapter 、 upper and lower specimens.

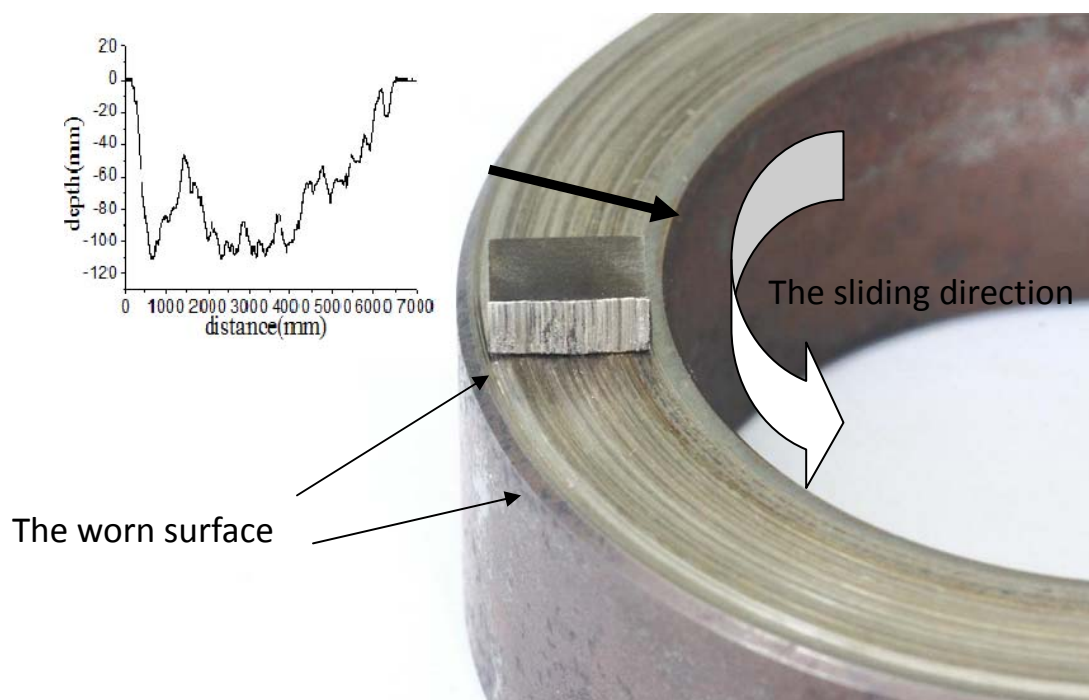

FigS3. Photograph of the worn surface of upper and lower specimen in based oil without additive. Inset figure:  $\alpha$ -stepper analysis along from the arrow direction.

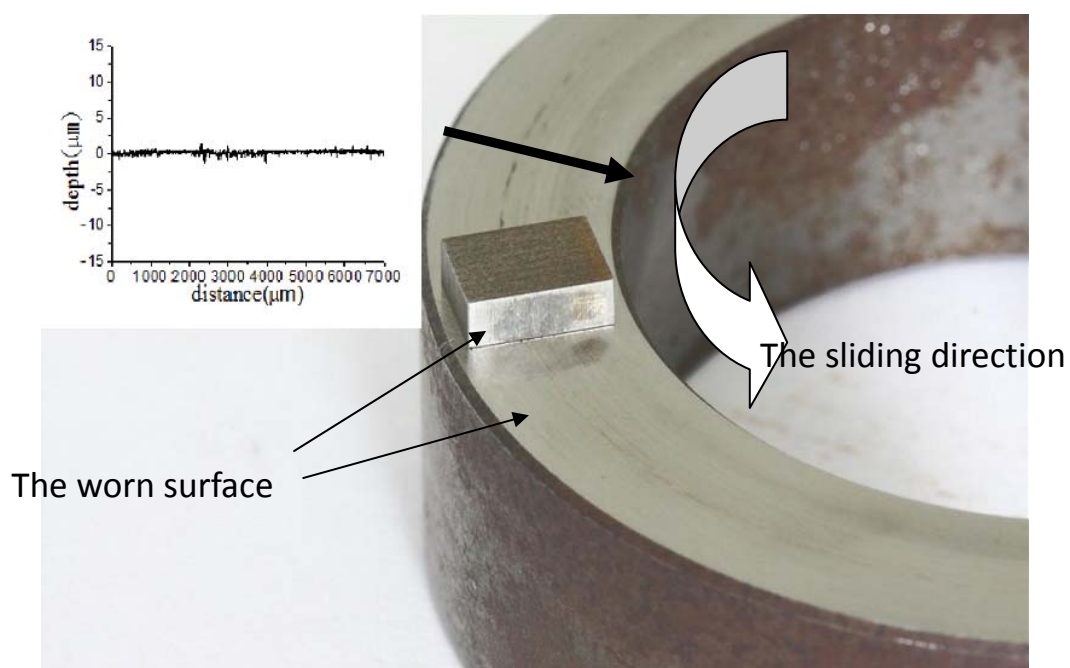

FigS4. Photograph of the worn surface of upper and lower specimen in based oil with 2000ppm dUDD-PMMA lubricant additive. Inset figure:  $\alpha$ -stepper analysis along from the arrow direction.

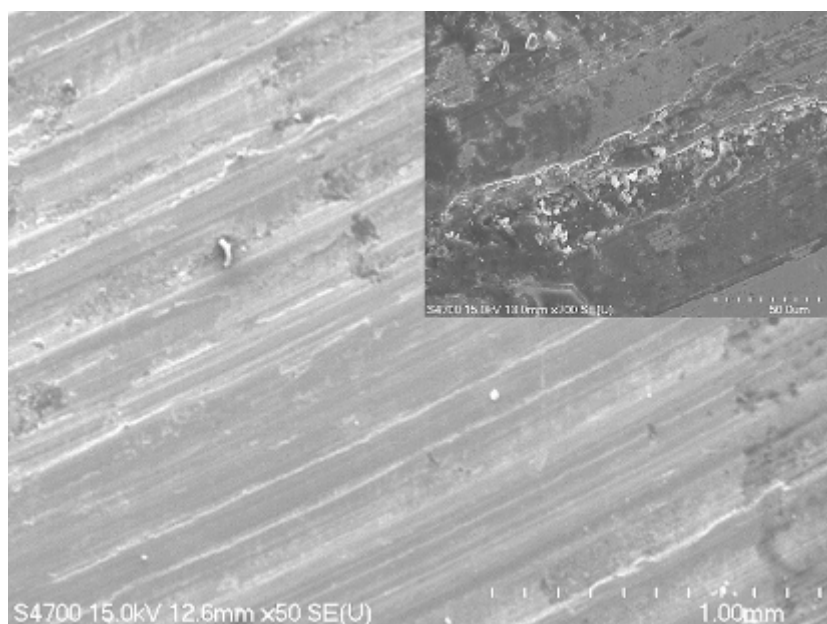

**Fig.S5(a)** The SEM image of worn surface of lower specimens in R68 oil without dUDD-PMMA lubricant additive.

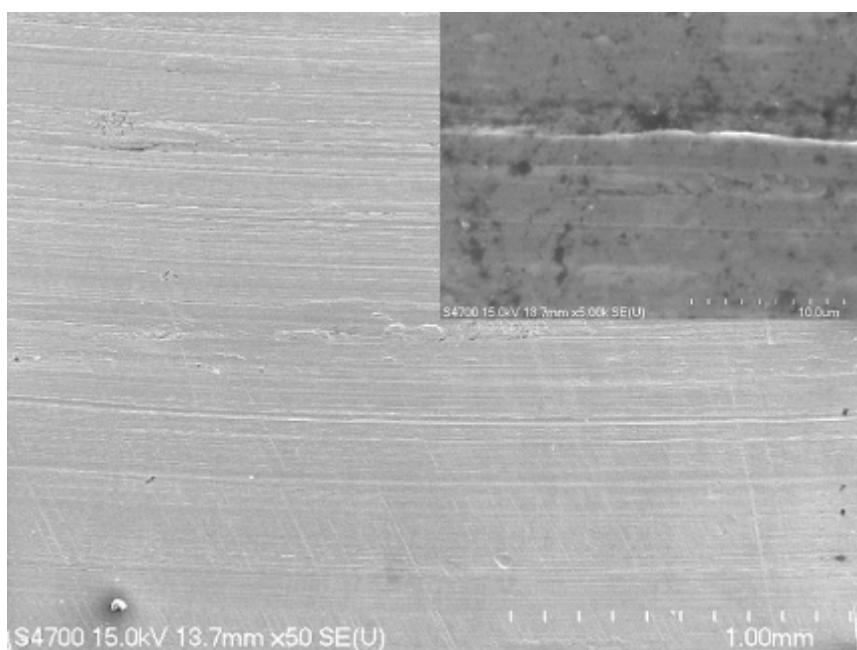

**Fig.S5(b)** The SEM image of worn surface of lower specimens in R68 oil with 3000 ppm dUDD-PMMA lubricant additive
